# Supplementary figures and images for: Morphogenesis Dynamics in Leishmania Differentiation
Source: MDPI journal article supplement (doi:10.3390/pathogens11090952), 2022-08-23

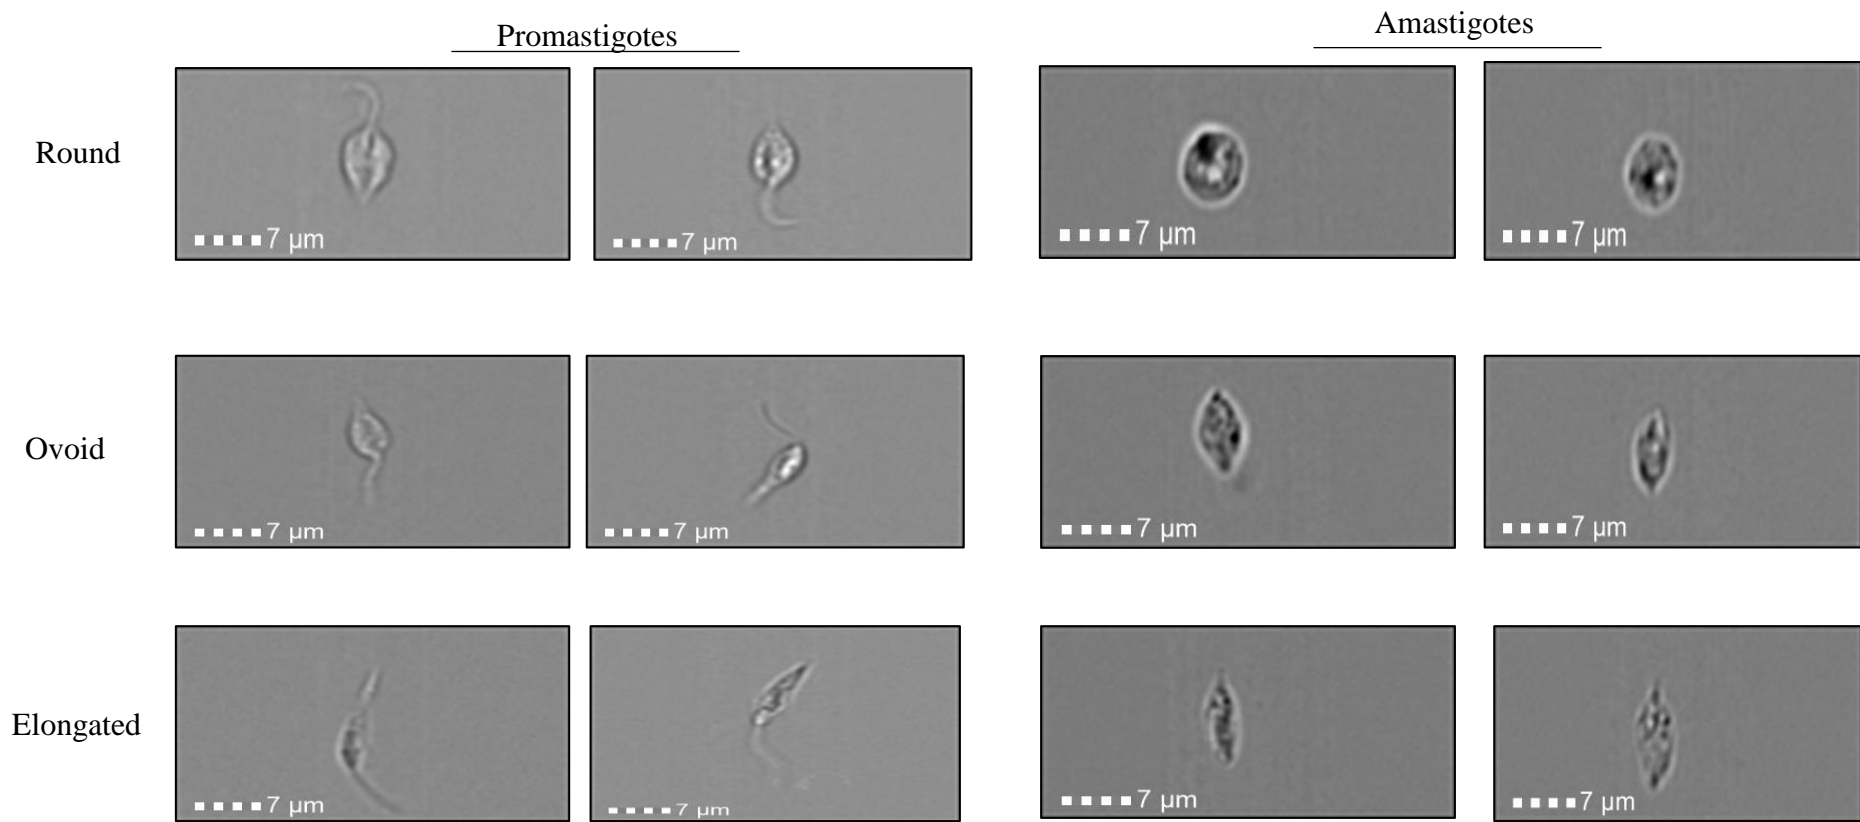

Figure S1. Form of Promastigotes and Amastigotes.

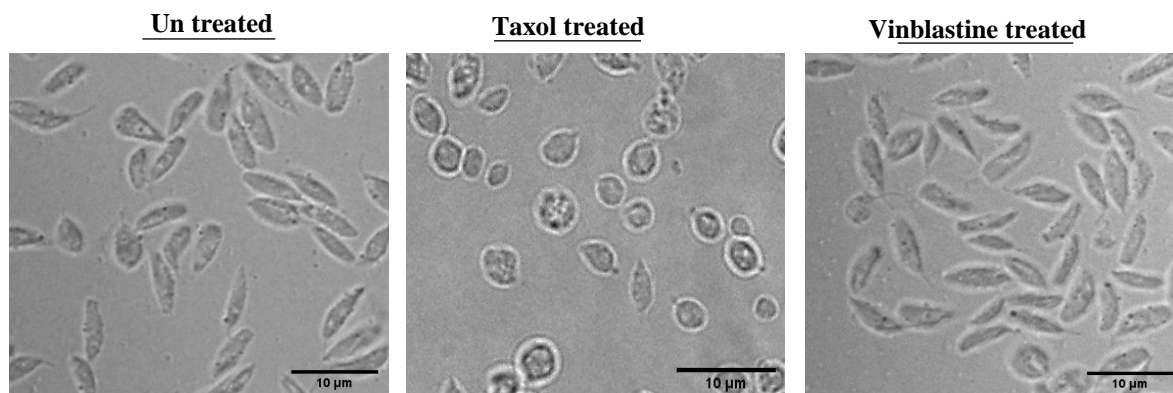

Figure- S2 Form of treated and untreated cells

Supplement: s1 [file s1]
